# Supplementary material
Source: PubMed Central journal article supplement (PMC4522365)

515 **SUPPLEMENTARY TABLES**

**Supplementary Table 1. Serum  $\beta$ -hCG and ultrasound findings in the EPL cohort.**

Note: Parentheses represent time of ultrasound and  $\beta$ -hCG relative to time of ECS, with minus

520 (-) representing time before ECS and positive (+) representing time after ECS.

Abbreviations: ECS=endocervical sample, FH=fetal heart tone, FP=fetal pole, GS=gestational sac, USG=ultrasound, w=weeks, d=days.

**Supplementary Table 2. Sources of antibodies used in this study.**

525

530

535

## SUPPLEMENTARY FIGURES

540

**Supplementary Figure 1. Antibody Titration.** Titration was implemented by serial dilution of antibodies in order to calculate the optimal concentration and to ensure the linearity of fluorescence signals. 5 $\mu$ g/ml was determined as the optimal concentration of all antibodies.

545

**Supplementary Figure 2. Expression of  $\beta$ -hCG in cells isolated by TRIC.** Cells labeled with anti- $\beta$ -hCG were examined by immunofluorescence microscopy. (A)  $\beta$ -hCG visualize using secondary antibody conjugated with to FITC (green). (B) Matching field of nuclei counterstained with DAPI (blue). (C) Overlay of FITC and DAPI. Size bar is 100  $\mu$ m.

550

555

| <b>EPL Patient</b> | <b>GA at time of ECS</b> | <b>EPL known at time of ECS</b> | <b>USG findings</b> | <b>β-hCG</b>     |
|--------------------|--------------------------|---------------------------------|---------------------|------------------|
| A                  | 5w6d                     | Yes                             | + FP, -FH<br>(-1d)  | 7,925<br>(-1d)   |
| B                  | 8w                       | Yes                             | Empty GS<br>(-1d)   | 66,290<br>(-1d)  |
| C                  | 6w5d                     | Yes                             | Empty GS<br>(-1d)   | 27,970<br>(-1d)  |
| D                  | 7w4d                     | Yes                             | Empty GS<br>(-7d)   | 20,383<br>(-7d)  |
| E                  | 7w2d                     | Yes                             | + FP, - FH<br>(-1d) | N/A              |
| F                  | 7w5d                     | Yes                             | Empty GS<br>(-7d)   | 16<br>(0)        |
| G                  | 7w5d                     | Yes                             | Empty GS<br>(-2d)   | 44,753<br>(-2d)  |
| H                  | 8w                       | Yes                             | + FP, -FH<br>(-1d)  | 17,024<br>(-4d)  |
| I                  | 5w                       | No                              | +FP, -FH<br>(+7d)   | 4,972<br>(+7d)   |
| J                  | 7w3d                     | No                              | + FP, -FH<br>(+14d) | 16,775<br>(+14d) |

| <b>Antigen</b>                                        | <b>Clone</b> | <b>Species</b> | <b>Company</b>          |
|-------------------------------------------------------|--------------|----------------|-------------------------|
| $\beta$ -hCG                                          | 5H4-E2       | Mouse          | Pierce<br>Biotechnology |
| Endoglin (ENG)                                        | 2022         | Goat           | R&D Systems             |
| Fms-like tyrosine kinase-<br>1 (FLT-1)                | 2321         | Goat           | R&D Systems             |
| Alpha-fetoprotein (AFP)                               | 189506       | Mouse          | R&D Systems             |
| Pregnancy-associated<br>plasma protein-A (PAPP-<br>A) | 5069         | Goat           | R&D Systems             |
| Galectin-13 (LGALS13)                                 | EPR2898(2)   | Rabbit         | Ambion                  |
| Galectin-14 (LGALS14)                                 | 511124       | Mouse          | R&D Systems             |
| Placental growth factor<br>(PGF)                      | 358905       | Rat            | R&D Systems             |

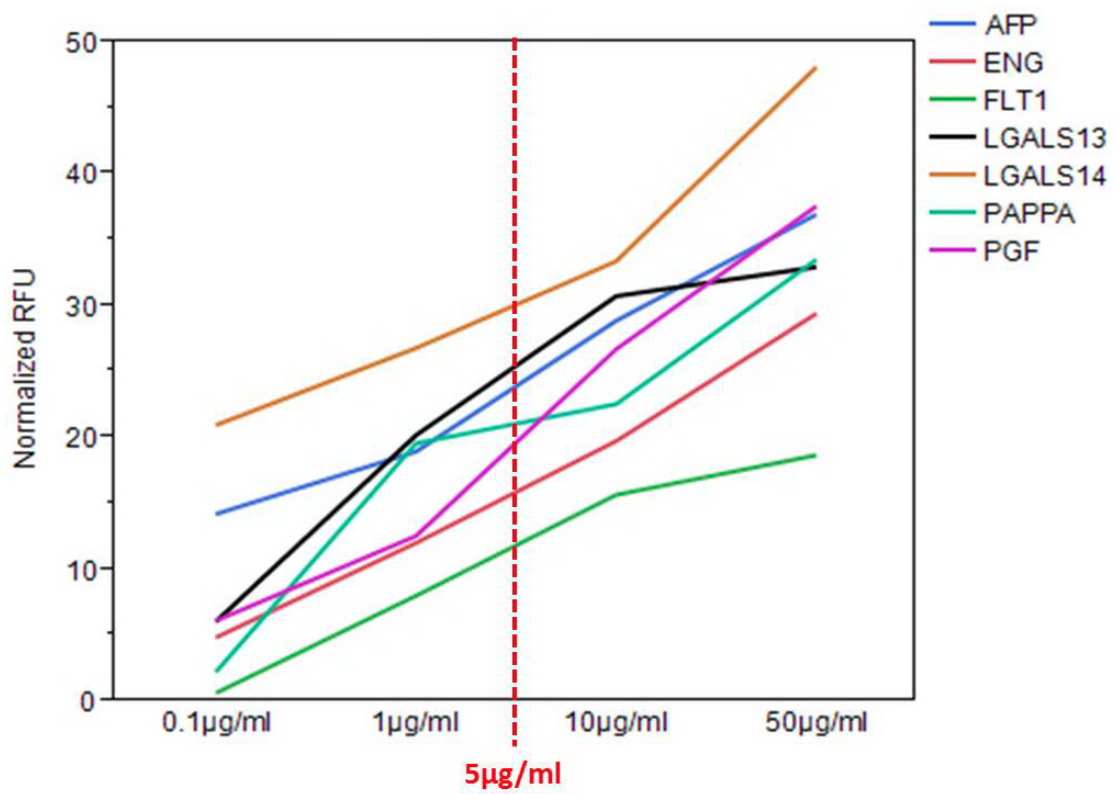

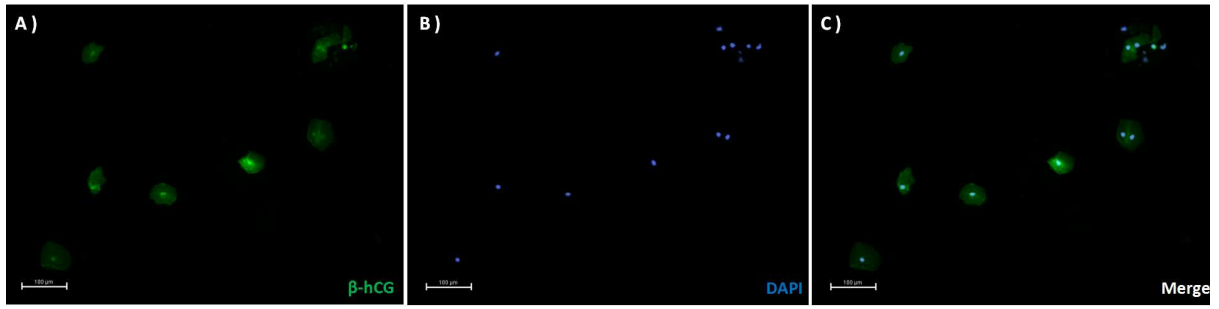

Supplement: NIHMS690529-supplement-supplement_1.pdf [file NIHMS690529-supplement-supplement_1.pdf]
